# Supplementary material
Source: PubMed Central journal article supplement (PMC2530896)

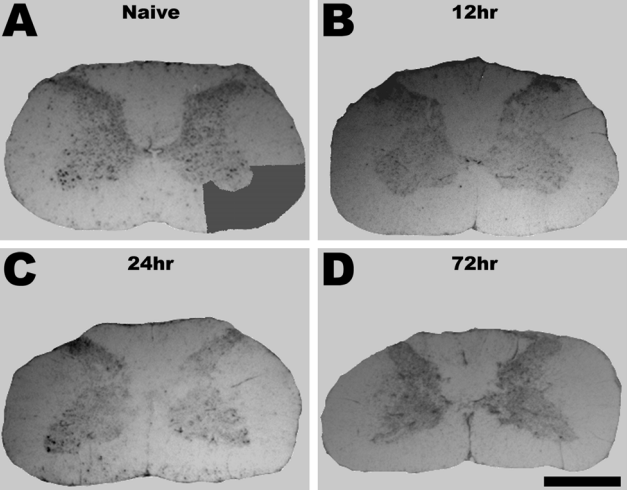

Supplement: NIHMS55209-supplement-01.pdf [file NIHMS55209-supplement-01.pdf]
